1 Nontypeable *Haemophilus influenzae* redox recycling of protein thiols promotes resistance to oxidative  
2 killing and bacterial survival in biofilms in a smoke related infection model

3 Benjamin C. Hunt<sup>1,2</sup>, Xin Xu<sup>1,2,3</sup>, Amit Gaggar<sup>1,2,3</sup>, and W. Edward Swords<sup>1,2#</sup>

4 <sup>1</sup>Division of Pulmonary, Allergy and Critical Care Medicine

5 <sup>2</sup>Gregory Fleming James Center for Cystic Fibrosis Research

6 <sup>3</sup>Program in Protease and Matrix Biology

7 University of Alabama at Birmingham School of Medicine

8 **Running title** (53 characters and spaces) Redox homeostasis in *Haemophilus influenzae* biofilms

9 #Corresponding author: 1918 University Blvd, MCLM 815

10 Birmingham, AL 35294

11 wswords@uabmc.edu

12 Author contributions

13 Experimental conception and design: BH, XX, AG, WES

14 Performed experiments: BH, XX

15 Data analysis and interpretation: BH, XX, WES

16 Wrote manuscript: BH, WES

## Abstract

Smoke exposure is a risk factor for community acquired pneumonia, which is typically caused by host adapted opportunists like nontypeable *Haemophilus influenzae* (NTHi). Genomic analyses of NTHi revealed homologs of enzymes involved in thiol metabolism, which can have key roles in oxidant resistance. Using a clinical NTHi isolate (NTHi 7P49H1), we generated isogenic mutant bacterial strains in which homologs of glutathione reductase (NTHi 0251), thiol peroxidase (NTHi 0361), thiol peroxidase (NTHi 0907), thioredoxin reductase (NTHi 1327) and glutaredoxin/peroxiredoxin (NTHi 0705) were inactivated. Bacterial protein analyses revealed significant increases in protein oxidation after oxidative stress for all the mutant strains. Similarly, each of these mutants were less resistant to oxidative killing compared with the parental strain; these phenotypes were reversed by genetic complementation. Quantitative confocal analysis of biofilms showed reduced biofilm thickness and density, and significant sensitization of bacteria within the biofilm structure to oxidative killing for thiol mutant strains. Smoke-exposed mice infected with NTHi 7P49H1 showed significantly increased lung bacterial load, as compared to control mice. Immunofluorescent staining of lung tissues showed NTHi communities on the lung mucosa, interspersed with host neutrophil extracellular traps; these bacteria had surface moieties associated with the *Hi* biofilm matrix, and transcript profiles consistent with NTHi biofilms. In contrast, infection with the panel of NTHi mutants showed significant decrease in lung bacterial load. Comparable results were observed in bactericidal assays with neutrophil extracellular traps in vitro. Thus, we conclude that thiol mediated redox homeostasis promotes persistence of NTHi within biofilm communities.

Word count: 246 words

## 38 **Importance**

39           Chronic bacterial respiratory infections are a significant problem for smoke exposed individuals,  
40 especially those with chronic obstructive pulmonary disease (COPD). These infections often persist  
41 despite antibiotic use. Thus, the bacteria remain and contribute to the development of inflammation and  
42 other respiratory problems. Respiratory bacteria often form biofilms within the lungs, while growing in  
43 a biofilm their antibiotic and oxidative stress resistance is incredibly heightened. It is well documented  
44 that redox homeostasis genes are upregulated during this phase of growth. Many common respiratory  
45 pathogens such as NTHi and *Streptococcus pneumoniae* are reliant on scavenging from the host the  
46 necessary components they need to maintain these redox systems. This work here begins to lay down  
47 the foundation for exploiting this requirement and thiol redox homeostasis pathways of these bacteria  
48 as a therapeutic target for managing chronic respiratory bacterial infections, which are resistant to  
49 traditional antibiotic treatments alone.

## 50 Introduction

51 Cigarette smoke exposure, be it primary or secondary, extracts a significant economic and  
52 health burden in the United States and globally. In the US alone, a significant proportion of healthcare  
53 expenditures are directed at dealing with smoke related issues (1). Cigarette smoke is a complex  
54 mixture that elicits significant changes in vascular, airway, and immune function, which lead to the  
55 development and exacerbation of a variety of diseases (2–8). Exposure to cigarette smoke is a  
56 significant risk factor for community acquired pneumonia with both bacterial and viral infections that  
57 can exacerbate and further contribute to the development of smoke associated morbidities (2, 9–11).

58 Smoking is associated with development of chronic bacterial infections which are typically  
59 caused by host adapted opportunists such as nontypeable *Haemophilus influenzae* (NTHi) (12–16).  
60 NTHi is a gram-negative pathobiont that typically asymptotically resides in the nasopharynx with  
61 little to no overt pathology. However, in persons with compromised airway clearance, NTHi can colonize  
62 the lower airways and establish chronic infections (12, 16–18). NTHi are thought to persist within biofilm  
63 communities on the airway mucosa during a variety of opportunistic infections (19). Biofilms are  
64 complex, heterogeneous communities that are intransient to environmental stressors, antibiotics, or host  
65 immune effectors largely due to so-called “persister” subpopulations within the biofilm structure (20–  
66 22). These bacterial biofilms display unique genetic expression profiles, enhanced antimicrobial and  
67 oxidative stress resistance, and increased resistance to immune cell clearance compared to  
68 planktonically growing bacteria (18, 20, 23–26).

69 Phagocytes undergo an “oxidative burst” that culminates in release of reactive oxygen species  
70 (ROS), which is a key component of the innate immune response to bacterial infection (27, 28). Thus,  
71 maintaining proper redox homeostasis and having mechanisms for counteracting oxidative stress is  
72 vital for pathogens to colonize and persist within their host (29–32). Bacteria respond to ROS by  
73 activating antioxidant defenses, shifting metabolic pathways, and promoting the formation of biofilms  
74 (30, 33, 34). Glutathione (GSH) is a cysteine containing thiol tripeptide with important roles in oxidative

75 stress defenses in a wide array of biological systems (29, 35–37). Importantly, *Streptococcus*  
76 *pneumoniae* and *Haemophilus influenzae* are reliant on the import of exogenous GSH from the airway  
77 environment where it is abundant (38). Peroxiredoxin/glutaredoxin (*pdgX*) is a GSH metabolic enzyme  
78 which has been shown to be upregulated within NTHi biofilms, as well as patient sputa (15, 29, 30).

79 Analysis of sequenced NTHi genomes revealed a number of homologs of enzymes involved in  
80 reduction of oxidized thiols, including predicted glutathione reductase (*gor*, NTHI0251), thiol peroxidase  
81 (*bcp*, NTHI0361), thiol peroxidase (*tpx*, NTHI0907), thioredoxin reductase (*trxB*, NTHI1327) and  
82 glutaredoxin/peroxiredoxin (*pdgX*, NTHI0705) (**Table 1**). We used a bacterial genetic approach to  
83 generate a number of isogenic mutant strains which were then used investigate the importance of this  
84 pathway in colonization, persistence, and biofilm formation within the airways. We show that disruption  
85 of thiol redox homeostasis in NTHi results in significant susceptibility to oxidative stress, neutrophil  
86 extracellular trap killing, and defects in persistence in a susceptible smoke exposed mouse infection  
87 model. Based on these results, we conclude that thiol metabolism is an important determinant of NTHi  
88 colonization and persistence within biofilm communities.

## 89 **Materials and methods**

90 **Bacteria and culture methods.** NTHi 7P49H1 (provided by Dr. Timothy Murphy, University of  
91 Buffalo) is a sputum isolate from a patient with chronic obstructive pulmonary disease (39). NTHi  
92 bacteria were cultured at 37° C on brain heart infusion agar (Difco, NJ, USA) supplemented with  
93 nicotinamide adenine dinucleotide (10 µg/ml, Sigma) and hemin (10 µg/ml, ICN Biochemical). Bacteria  
94 were harvested from the surface of overnight culture plates and resuspended in PBS to the desired  
95 optical density to generate inocula.

96 **Measurement of bacterial resistance to oxidant.** Bacteria were suspended in sBHI media and  
97 seeded at a concentration of  $\sim 10^8$  CFU/ml into a 24-well dish, cultured at 37° C and 5% CO<sub>2</sub> for 24 h,  
98 after which growth media was aspirated and replaced with PBS containing varying concentrations of  
99 hydrogen peroxide as indicated in figure legends. Bacteria were exposed to oxidant for 30 min after  
100 which surface adherent bacteria were gently washed with PBS three times. Bacterial biofilms were then  
101 scraped off the bottom of the well, serially diluted, and plated on sBHI for plate-count.

102 **Quantification of cysteine sulfenic acid oxidation.** Bacteria were resuspended in PBS to an  $\sim 10^8$   
103 CFU/mL; bacterial density was confirmed by plate-count. Bacteria were then centrifuged, and the  
104 supernatant was removed and replaced with a 500 mM hydrogen peroxide solution, and incubated for  
105 30 minutes at 37°C, after which the supernatant was removed and pellet washed with PBS. Bacteria  
106 were lysed enzymatically using a lysis buffer (50 mM Tris pH 8.0, 10% glycerol, 0.1% TritonX-100, and  
107 100 mg/ml lysozyme), while simultaneously labeling for cysteine sulfenic acids (CSAs) with 1mM biotin-  
108 1,3-cyclopentanedione (BP1) (Kerafast, Boston, MA, USA). Lysis buffer was prepared fresh before use  
109 and BP1 was added immediately prior to use. Samples were lysed and labeled for CSAs for 1 hour at  
110 37°C. After lysis and biotin labeling of CSAs, the CSA modified proteins were isolated using Takara Bio  
111 Capturem™ streptavidin miniprep columns (Shiga, Japan) following the manufacturer's instructions.  
112 Next, samples were run on an 4-20% gradient SDS-PAGE gel, stained using the Pierce™ silver stain

113 kit, and imaged. Relative CSA protein modifications was determined via densitometry using ImageJ Fiji  
114 (40).

115 **Measurement of bacterial killing by neutrophil extracellular traps.** Derivation and measurement of  
116 NTHi killing by neutrophil extracellular traps was essentially as described in previous studies (25, 41).  
117 HL60 monocyte cells were cultured in RPMI 1640 (Thermofisher, MA, USA) with 10% FBS, and  
118 differentiated for 5-6 d in RPMI containing 0.8% dimethyl formamide, then collected by centrifugation.  
119 Cells (~10<sup>6</sup>/ well) were seeded into wells of a 24-well dish and activated with 25 nM phorbol myristate  
120 acetate (PMA) (Sigma-Aldrich, MO, USA) for 10 minutes. NET formation was confirmed via  
121 microscopy. Cell culture media, with or without 20 µM cytochalasin D, was then added and cells were  
122 incubated for 15 minutes. Bacterial strains were then added at an MOI of 10 in triplicate and incubated  
123 for 30 minutes, then scraped and serially diluted and plated to enumerate bacterial counts. Bacterial  
124 killing was expressed as percentage of counts obtained from control wells with no HL60 cells. NET vs  
125 phagocytic killing was obtained by comparison to wells with cytochalasin D to those without.

126 **Cigarette smoke mxposure and mouse infections.** Mice (C57BL/6J) were acquired from Jackson  
127 Laboratory (Bar Harbor, ME, USA) and randomly assigned to an experimental group, whole cigarette  
128 smoke or ambient air control. Smoke group mice were placed in a whole-body exposure chamber and  
129 exposed to smoke from 3R4F research cigarettes (Louisville, KY, USA), twice daily for a period of 14  
130 days. Between the two smoke exposures for each day, animals were allowed a 2-hour rest period.  
131 Animals began smoke exposure at the minimum of 6 cigarettes per day, with the total number of  
132 cigarettes increase by 2 per day until reaching 24 total per day then remaining constant for the  
133 remainder of the regime. Animals were monitored continuously during smoke exposure. Cigarette  
134 smoke was generated by an automated cigarette smoke generator (SCIREQ, InExpose model), with a  
135 24-cigarette carousel. SCIREQ filters were monitored and weighed to measure total particulate matter  
136 exposure for comparisons to other murine smoke models. Animals exposed to smoke were stored  
137 separately from the air control groups. After completing the smoke exposure regimen, mice  
138 intratracheally infected with 10<sup>7</sup> CFUs of NTHi or vehicle control (PBS). Animals were euthanized 24,

139 48, and 72 hours post infection. All animal and infection procedures were performed according to  
140 AVMA laboratory standard procedures and were reviewed and approved by the UAB Institutional  
141 Animal Care and Use Committee.

142 **Immunofluorescent staining and confocal laser scanning microscopy.** Mouse lung tissue sections  
143 were sectioned via cryostat (Thermofisher CryoStar NX70 cryostat, 5  $\mu\text{m}$ /section) and fixed onto glass  
144 slides. NTHi bacteria were stained using polyclonal rabbit antiserum and goat anti-rabbit IgG Alexa 488  
145 secondary antibody conjugate. Cover slips were mounted using Prolong Gold antifade reagent with  
146 DAPI (Thermofisher, Waltham, MA). Confocal laser scanning microscopic analyses were performed  
147 using a Nikon A1R TE2000 inverted microscope (Nikon, Tokyo, Japan). CellROX Deep Red was  
148 utilized, following manufacturer's instructions, to image and measure oxidative stress in fixed bacterial  
149 biofilm samples (Thermofisher, Waltham, MA). Pixel intensity maps and quantification of biofilm images  
150 was done using BiofilmQ software (42). Images were segmented using the semi-manual Otsu threshold  
151 method. NTHi sialylated moieties in biofilm matrix were stained utilizing specific lectin conjugates,  
152 essentially as described previously (43). *Maackia amurensis* lectin (MAA) Texas Red conjugated  
153 specific for Neu5Ac  $\alpha$ (2,3) galactose (EY Laboratories, San Mateo, CA) was diluted to a final  
154 concentration of 100  $\mu\text{g}/\text{ml}$  in 0.01 M phosphate, 0.15 M NaCl, 0.05 M sodium azide buffer according  
155 to manufacturer's instructions. Representative images were created using Fiji imaging analysis  
156 software (40).

157 **Transcript quantification using qRT-PCR.** Bacterial RNA was extracted using the Monarch total  
158 RNA miniprep kit (New England Biolabs, Ipswich, MA) following manufacture's guidelines. RT-qPCR  
159 was performed using the Applied-Biosystems 7500 System, and oligonucleotide probes specific for  
160 *pdgX*, *luxS*, *dps*, *hktE* and *omp26* (**Table 2**). The *omp26* transcript was chosen as an endogenous  
161 control given that its expression does not vary between planktonic or biofilm mode of growth (44). The  
162 reaction mix used was the NEB Luna Universal following manufacturer's directions for cycling  
163 conditions (New England Biolabs, Ipswich, MA). All samples were run in duplicate. Transcript measures



164 were normalized relative to *omp26* levels from the same sample. Relative quantification of gene  
165 expression was determined using the comparative CT method ( $2^{\Delta\Delta CT}$ ).

166 **Statistical analyses.** Data were analyzed by the one-way analysis of variance (ANOVA) with Tukey's  
167 multiple comparisons test. All bar graphs represent mean and error bars represent standard error of  
168 the mean (SEM) or standard deviation (SD) as noted in the figure legend. All mouse infection  
169 experiments were repeated at least three times. Data from multiple independent animal experiments  
170 were averaged together. Animal numbers in each group are denoted in the figure legends. \*  $P < 0.05$ ,  
171 \*\*  $P < 0.005$ , \*\*\*  $P < 0.0005$ , \*\*\*\*  $P < 0.00005$ ;  $P$  values  $\leq 0.05$  were considered statistically significant.

## 172 Results

173 To assess the susceptibility of NTHi 7P49H1 and our isogenic mutant strains to oxidative stress,  
174 we performed a killing assay where we exposed NTHi biofilms to varying concentrations of hydrogen  
175 peroxide (H<sub>2</sub>O<sub>2</sub>) for 30 min. Similar to prior experiments with other NTHi strains, minimal killing of NTHi  
176 7P49H1 was observed except at the highest concentrations of hydrogen peroxide. In contrast, each of  
177 the isogenic mutant strains had significant levels of killing with bacterial counts going below the  
178 detectable limit of viable plate counting when exposed to hydrogen peroxide. Resistance to oxidant  
179 was restored by genetic complementation of the isogenic mutants (Figure 1A). Comparable results  
180 were obtained in parallel experiments with hypochlorous acid (HOCl) as the oxidative stressor (data  
181 not shown).

182 To further investigate the susceptibility and redox state of the isogenic mutants, we purified  
183 oxidized bacterial proteins based on affinity of cysteine sulfenic acid (CSA) for the nucleophile 1,3-  
184 cyclopentanedione (BP1) (45–47). Biotin-linked BP1 was used to purify CSA-modified proteins from  
185 bacterial lysates, which were quantified by SDS/PAGE and silver stain. In comparison to the parent  
186 strain, thiol redox mutants displayed significantly higher levels of cysteine sulfenic acids and displayed  
187 2-to-3.5-fold higher change in cysteine sulfenic acid levels (Figure 1B). This is indicative of an  
188 imbalance in the redox homeostasis of the isogenic mutants and of a heightened sensitivity to oxidative  
189 stress. Together, reactive oxygen species killing and the measurement of cysteine sulfenic acids show  
190 that disruption of the thiol redox pathway at different steps can similarly sensitize and compromise  
191 NTHi's ability to maintain redox homeostasis.

192 To further investigate the redox homeostasis and oxidant resistance of our isogenic mutant  
193 biofilms when exposed to oxidative stress, we utilized confocal scanning laser microscopy alongside a  
194 fluorescent stain to visualize the areas of the biofilm with the highest degree of reactive oxygen species  
195 and BiofilmQ to quantitatively analyze the confocal images. Using confocal imaging, we generated  
196 vertical Z-series NTHi biofilms after exposure to 500 mM hydrogen peroxide, with the objective of

197 defining any effects on biofilm formation/maturation and identify and localize bacterial subpopulations  
198 differentially impacted by oxidative stress. As observed previously, NTHi formed thick communities  
199 extensive three dimensional height and structure, which are maintained after exposure to oxidative  
200 stress. In contrast, NTHi 7P49H1 *pdgX* biofilms were largely diminished in three-dimensional structure  
201 following peroxide treatment, consistent with reduced resistance (Figure 2A).

202 Quantifying and localizing areas with highest intensity of CellRox fluorescent signal, and thus  
203 presumably higher oxidative stress, were the areas of the biofilm closest to the substrata and the  
204 internal areas of mature tower structures (Figure 2A). Additionally, when utilizing the BiofilmQ software  
205 to quantitate the mean pixel intensity of the CellRox fluorescent signal, it was found that the isogenic  
206 mutants displayed heightened mean pixel intensities. Of the isogenic mutant strains, NTHi 7P49H1  
207 *pdgX* and NTHi 7P49H1 1327, were found to have significantly higher mean pixel intensities when  
208 compared to the parent strain. The NTHi 7P49H1 *pdgX* isogenic mutant displayed the highest mean  
209 intensity, nearly double the mean for the parent strain (Figure 2B). This indicates that the isogenic  
210 mutant biofilms are inherently more susceptible to oxidative stress than the parent strain, particularly  
211 the NTHi 7P49H1 *pdgX* isogenic mutant biofilm.

212 Our *in vitro* data spurred on the desire to establish and utilize a smoke exposed murine model  
213 and investigate the consequences of the disruption of redox homeostasis on persistence and disease.  
214 To assess the impact of thiol metabolism on NTHi colonization and persistence in the lung, we  
215 performed infection studies on mice (C57/Bl6) following exposure to cigarette smoke. The smoke  
216 exposure regime and timeline of infections are outlined in Figure 3A. Bacteria were recovered from the  
217 lungs of smoke exposed mice infected by NTHi 7P49H1 for up to 48 h post-infection; this was in contrast  
218 to control mice which cleared infection. Each of the thiol redox mutants tested were unable to establish  
219 a successful infection in the susceptible smoke exposed mouse lung, showing no detectable amounts  
220 of NTHi at any time post infection (Figure 3B). Animals infected with isogenic thiol mutants had  
221 significantly less weight loss over the course of infection, indicating overall less severe disease.

Using confocal scanning laser microscopy revealed that in the airways of smoke exposed mice infected with the parent strain multicellular NTHi communities can be detected at 24 and 48 hours post infection (Figure 4A). These some multicellular communities are absent in the airways of animals infected with isogenic thiol mutants. To confirm that these multicellular communities found within the airways were NTHi biofilms stained the tissue sections with fluor conjugated lectins that would bind specific linkages within the NTHi biofilm extracellular matrix. Doing so revealed that our aggregates of NTHi overlap with the staining for the biofilm extracellular matrix, thus showing that these communities are indeed imbedded in a biofilm like structure (Figure 4A). Additionally, RT-qPCR analysis of bacterial transcripts isolated from the airways 48 hours post infection revealed that the expression of biofilm related genes (*pdgX*, *luxS*, *dps*) were elevated. Combined with the confocal imaging, the expression of biofilm associated genes further cements that these structures are indeed NTHi biofilms forming within the lungs of susceptible smoke exposed mice.

Prior work from our group has shown that resistance to oxidant is central NTHi survival and growth within neutrophil extracellular traps and thus important for establishing a chronic infection (25). To assess bacterial survival of our thiol redox isogenic mutants and to gain deeper insight into the lack of persistence within our smoke exposed murine model we turned to cell culture methods and confocal scanning laser microscopy methods once again. To investigate the susceptibility of our mutant strains to killing via neutrophil extracellular traps we used differentiated HL60 cells activated with phorbol myristate acetate and inhibited phagocytosis using cytochalasin-D. Unsurprisingly, the parent strain was highly resistant to killing via neutrophil extracellular traps, whilst the isogenic thiol mutant strains were each significantly more susceptible to killing (Figure 5A). Curious about this finding that our mutant strains had a heightened susceptibility to neutrophil extracellular trap killing; we returned to our lung tissue sections and confocal scanning laser microscopy, however, this time we stained for DNA and citrullinated histone H3, both components of neutrophil extracellular traps. We see in the airways of smoke exposed mice 48 hours post infection NTHi multicellular communities surrounded by neutrophil extracellular traps (Figure 5B). Additionally, using a myeloperoxidase activity assay to show the

248 increased level of myeloperoxidase activity at 48 hours post infection combined with the presence of  
249 neutrophil extracellular traps, these surrounding neutrophils are activated (Figure 5C). Together, these  
250 data showing the susceptibility of our isogenic thiol strains to killing via neutrophil extracellular traps  
251 and the finding that NTHi biofilms in our smoke exposed murine airways are surrounded by neutrophil  
252 extracellular traps indicates that the isogenic thiol mutant strains might have failed to establish a  
253 persistent infection due to these deficiencies.

254

## 255 Discussion

256 Chronic bacterial infections are a significant problem for patients with mucosal clearance  
257 defects, including patients with cystic fibrosis, COPD and preceding viral infection (16, 48, 49). Bacterial  
258 biofilms, which display heightened resistance to antibiotics, oxidative stress, and house persister cells,  
259 contribute significantly to the development of chronic infections (24, 30, 49–51). Thus, management of  
260 biofilm related infections and developing novel therapeutics to counteract the persistence advantages  
261 biofilms provide has the potential to greatly benefit many patient populations. It has been documented  
262 that a biofilm mode of growth, both *in vitro* and *in vivo*, is associated with an increase in the expression  
263 of redox related genes, one example being *pdgX*, which has been shown to be upregulated in the  
264 COPD lung (15, 30, 33, 44). Compromising a biofilm's ability to respond to oxidative stress should  
265 render the bacteria within more susceptible to clearance by the ROS naturally generated by the immune  
266 system.

267 Before the development of novel therapeutics can begin, work must be done to investigate the  
268 mechanisms of thiol redox homeostasis that is employed by bacteria, in this instance we focus on the  
269 relevant pathogen nontypeable *Haemophilus influenzae*. Using a series of congenic mutants, we aim  
270 to investigate the impact of the disruption of thiol redox homeostasis at varying points in the pathway  
271 and the resulting consequences of doing so. Using *in vitro* analysis of the redox homeostasis  
272 capabilities of our mutants, we show that disruption along this pathway results in significant  
273 susceptibility to oxidative stress and excess protein damage (Figure 1A). Interestingly, disruption of  
274 these differing thiol redox genes resulted in similar phenotypes. This highlights the importance of this  
275 pathway and signifies that there are potentially multiple therapeutic targets within this pathway that are  
276 worth pinpointing. Additionally, using confocal scanning laser microscopy alongside BiofilmQ analysis,  
277 we were able to show that the mature biofilms of our mutant strains are susceptible to oxidative stress,  
278 with much of the highest levels of stress being located in the portions of the biofilm closest to the  
279 substrata (Figure 2).

280 Seeking to further delineate the *in vitro* phenotype, we utilized cell culture methods to quantify  
281 defects in immune cell resistance, specifically to neutrophil extracellular traps. Given the heightened  
282 susceptibility to oxidative stress our thiol redox mutants possess, it is unsurprising that our mutant  
283 strains are also significantly more susceptible to killing via neutrophil extracellular traps released from  
284 activated HL60 cells (Figure 5A). This data is encouraging and lends credence to the notion that if a  
285 therapeutic drug were able to disrupt NTHi thiol redox homeostasis, it could enable clearance by the  
286 normal immune response to NTHi.

287 The results discussed thus far have all been *in vitro*, however, using a smoke exposed murine  
288 model, we were able to investigate whether the same phenotypes persist when brought into a disease  
289 relevant *in vivo* model for NTHi lung infections (Figure 3A). As is the case in human patients, smoke  
290 exposed animals were susceptible to infection by the parent strain, however, thiol redox mutant strains  
291 were unable to establish an infection in the susceptible smoke exposed airways, showing no detectable  
292 CFUs at 24- or 48-hours post-infection (Figure 3B). Based on the *in vitro* data, it is reasonable to  
293 surmise that this may be due to defects in the ability to respond to the ROS produced by the immune  
294 system during infection. Additionally, using confocal microscopy and immunofluorescent staining  
295 techniques, it was possible to show that NTHi biofilms, visible as bacterial aggregates surrounded by  
296 NTHi specific biofilm matrix components, formed within the smoke exposed animals infected with the  
297 parent strain, whilst no biofilms were detected in animals infected with mutant strains (Figure 4A).  
298 Further adding to the microscopy, RT-qPCR analysis of biofilm related genes showed increased  
299 expression of these genes of interest in parent strain infected animals (Figure 4B). Finally, we know  
300 that these biofilms are surrounded by activated neutrophils and exposed to neutrophil extracellular traps  
301 while within the smoke exposed lung (Figure 5). These neutrophil extracellular traps contribute  
302 significantly to the development of a highly oxidatively stressful environment and could thus be  
303 responsible for the failure of the thiol mutant strains to establish and infection within the susceptible  
304 animal model. Collectively, the *in vivo* data coincides and reinforces that *in vitro* work presented

305 previously. Disruption of the thiol redox homeostasis pathway results in significant impairments in the  
306 ability of NTHi to establish a successful infection.

307 Taken together, our *in vitro* and *in vivo* work highlights importance of glutathione and thiol  
308 metabolism in controlling redox imbalances for NTHi, particularly within the biofilm mode of growth.  
309 Targeting these processes for biofilm-directed antimicrobials is an especially intriguing possibility for  
310 future work.

311

312

313

314

315

316

317

318

319

320

321

322

323



324 **Acknowledgments**

325 The authors acknowledge helpful conversations and bioinformatics assistance from Al Claiborne (Wake  
326 Forest School of Medicine) as well as significant input and helpful discussions with colleagues. This  
327 work was supported by NIH research grants R21 AI133445 and R21 AI144507 to W.E.S, and  
328 RO1HL102371 awarded to A.G. B.C.H. was a trainee in the UAB Predoctoral Training Program in Lung  
329 Biology (NIH T32 HL134640).

## 330 References

- 331 1. Ekpu VU, Brown AK. 2015. The Economic Impact of Smoking and of Reducing Smoking  
332 Prevalence: Review of Evidence. *Tob Use Insights* 8:1–35.
- 333 2. Duffney PF, Embong AK, McGuire CC, Thatcher TH, Phipps RP, Sime PJ. 2020. Cigarette  
334 smoke increases susceptibility to infection in lung epithelial cells by upregulating caveolin-  
335 dependent endocytosis. *PLoS ONE* 15.
- 336 3. Lu Q, Gottlieb E, Rounds S. 2018. Effects of cigarette smoke on pulmonary endothelial cells. *Am*  
337 *J Physiol - Lung Cell Mol Physiol* 314:L743–L756.
- 338 4. Aghapour M, Raee P, Moghaddam SJ, Hiemstra PS, Heijink IH. 2017. Airway Epithelial Barrier  
339 Dysfunction in Chronic Obstructive Pulmonary Disease: Role of Cigarette Smoke Exposure. *Am*  
340 *J Respir Cell Mol Biol* 58:157–169.
- 341 5. Aridgides DS, Mellinger DL, Armstrong DA, Hazlett HF, Dessaint JA, Hampton TH, Atkins GT,  
342 Carroll JL, Ashare A. 2019. Functional and metabolic impairment in cigarette smoke-exposed  
343 macrophages is tied to oxidative stress. *Sci Rep* 9:1–11.
- 344 6. Sopori M. 2002. Effects of cigarette smoke on the immune system. 5. *Nat Rev Immunol* 2:372–  
345 377.
- 346 7. Stämpfli MR, Anderson GP. 2009. How cigarette smoke skews immune responses to promote  
347 infection, lung disease and cancer. *Nat Rev Immunol* 9:377–384.
- 348 8. Nuorti JP, Mcgeer A. 2000. Cigarette Smoking and Invasive Pneumococcal Disease. *N Engl J*  
349 *Med* 9.
- 350 9. Arcavi L, Benowitz NL. 2004. Cigarette Smoking and Infection. *Arch Intern Med* 164:2206.

- 351 10. Hong MJ, Gu BH, Madison M, Landers C, Tung HY, Kim M, Yuan X, You R, MacHado AA,  
352 Gilbert BE, Soroosh P, Elloso M, Song L, Chen M, Corry DB, Diehl G, Kheradmand F. 2018.  
353 Protective Role of  $\gamma\delta$  T Cells in Cigarette Smoke and Influenza Infection. *Mucosal Immunol*  
354 11:894–908.
- 355 11. Lawrence H, Hunter A, Murray R, Lim WS, McKeever T. 2019. Cigarette smoking and the  
356 occurrence of influenza – Systematic review. *J Infect* 79:401–406.
- 357 12. Duell BL, Su Y-C, Riesbeck K. 2016. Host–pathogen interactions of nontypeable *Haemophilus*  
358 *influenzae*: from commensal to pathogen. *FEBS Lett* 590:3840–3853.
- 359 13. Beech AS, Lea S, Kolsum U, Wang Z, Miller BE, Donaldson GC, Wedzicha JA, Brightling CE,  
360 Singh D. 2020. Bacteria and sputum inflammatory cell counts; a COPD cohort analysis. *Respir*  
361 *Res* 21:289.
- 362 14. Sriram KB, Cox AJ, Clancy RL, Slack MPE, Cripps AW. 2018. Nontypeable *Haemophilus*  
363 *influenzae* and chronic obstructive pulmonary disease: a review for clinicians. *Crit Rev Microbiol*  
364 44:125–142.
- 365 15. Murphy TF, Kirkham C, Sethi S, Lesse AJ. 2005. Expression of a peroxiredoxin–glutaredoxin by  
366 *Haemophilus influenzae* in biofilms and during human respiratory tract infection. *FEMS Immunol*  
367 *Med Microbiol* 44:81–89.
- 368 16. Ahearn CP, Gallo MC, Murphy TF. 2017. Insights on persistent airway infection by non-typeable  
369 *Haemophilus influenzae* in chronic obstructive pulmonary disease. *Pathog Dis* 75.
- 370 17. Clementi CF, Murphy TF. 2011. Non-Typeable *Haemophilus influenzae* Invasion and  
371 Persistence in the Human Respiratory Tract. *Front Cell Infect Microbiol* 1.
- 372 18. Starner TD, Zhang N, Kim G, Apicella MA, McCray PB. 2006. *Haemophilus influenzae* Forms  
373 Biofilms on Airway Epithelia. *Am J Respir Crit Care Med* 174:213–220.

- 374 19. Swords WE. 2012. Nontypeable *Haemophilus influenzae* biofilms: role in chronic airway  
375 infections. *Front Cell Infect Microbiol* 2.
- 376 20. Yan J, Bassler BL. 2019. Surviving as a community: antibiotic tolerance and persistence in  
377 bacterial biofilms. *Cell Host Microbe* 26:15–21.
- 378 21. Van Acker H, Van Dijck P, Coenye T. 2014. Molecular mechanisms of antimicrobial tolerance  
379 and resistance in bacterial and fungal biofilms. *Trends Microbiol* 22:326–333.
- 380 22. Prigent-Combaret C, Vidal O, Dorel C, Lejeune P. 1999. Abiotic Surface Sensing and Biofilm-  
381 Dependent Regulation of Gene Expression in *Escherichia coli*. *J Bacteriol* 181:5993–6002.
- 382 23. Roy R, Tiwari M, Donelli G, Tiwari V. 2017. Strategies for combating bacterial biofilms: A focus  
383 on anti-biofilm agents and their mechanisms of action. *Virulence* 9:522–554.
- 384 24. Bjarnsholt T. 2013. The role of bacterial biofilms in chronic infections. *APMIS* 121:1–58.
- 385 25. Hong W, Juneau RA, Pang B, Swords WE. 2009. Survival of Bacterial Biofilms within Neutrophil  
386 Extracellular Traps Promotes Nontypeable *Haemophilus influenzae* Persistence in the Chinchilla  
387 Model for Otitis Media. *J Innate Immun* 1:215–224.
- 388 26. Sultana S, Foti A, Dahl J-U. 2020. Bacterial Defense Systems against the Neutrophilic Oxidant  
389 Hypochlorous Acid. *Infect Immun* 88.
- 390 27. Rosales C. 2020. Neutrophils at the crossroads of innate and adaptive immunity. *J Leukoc Biol*  
391 108:377–396.
- 392 28. Kohchi C, Inagawa H, Nishizawa T, Soma G-I. 2009. ROS and Innate Immunity. *Anticancer Res*  
393 29:817–821.
- 394 29. Harrison A, Bakaletz LO, Munson RS. 2012. *Haemophilus influenzae* and oxidative stress. *Front*  
395 *Cell Infect Microbiol* 2.

- 396 30. Ong KS, Mawang CI, Daniel-Jambun D, Lim YY, Lee SM. 2018. Current anti-biofilm strategies  
397 and potential of antioxidants in biofilm control. *Expert Rev Anti Infect Ther* 16:855–864.
- 398 31. Ezraty B, Gennaris A, Barras F, Collet J-F. 2017. Oxidative stress, protein damage and repair in  
399 bacteria. *Nat Rev Microbiol* 15:385–396.
- 400 32. Imlay JA. 2013. The molecular mechanisms and physiological consequences of oxidative stress:  
401 lessons from a model bacterium. *Nat Rev Microbiol* 11:443–454.
- 402 33. Gambino M, Cappitelli F. 2016. Mini-review: Biofilm responses to oxidative stress. *Biofouling*  
403 32:167–178.
- 404 34. Najmuldeen H, Alghamdi R, Alghofaili F, Yesilkaya H. 2019. Functional assessment of microbial  
405 superoxide dismutase isozymes suggests a differential role for each isozyme. *Free Radic Biol*  
406 *Med* 134:215–228.
- 407 35. Vergauwen B, Pauwels F, Vaneechoutte M, Beeumen JJV. 2003. Exogenous Glutathione  
408 Completes the Defense against Oxidative Stress in *Haemophilus influenzae*. *J Bacteriol*  
409 185:1572.
- 410 36. Vergauwen B, Elegheert J, Dansercoer A, Devreese B, Savvides SN. 2010. Glutathione import  
411 in *Haemophilus influenzae* Rd is primed by the periplasmic heme-binding protein HbpA. *Proc*  
412 *Natl Acad Sci U S A* 107:13270–13275.
- 413 37. Smirnova GV, Oktyabrsky ON. 2005. Glutathione in Bacteria. *Biochem Mosc* 70:1199–1211.
- 414 38. Ghezzi P. 2011. Role of glutathione in immunity and inflammation in the lung. *Int J Gen Med*  
415 4:105–113.

- 416 39. Zhang L, Xie J, Patel M, Bakhtyar A, Ehrlich GD, Ahmed A, Earl J, Marrs CF, Clemans D,  
417 Murphy TF, Gilsdorf JR. 2012. Nontypeable *Haemophilus influenzae* Genetic Islands Associated  
418 with Chronic Pulmonary Infection. *PLoS ONE* 7.
- 419 40. Schindelin J, Arganda-Carreras I, Frise E, Kaynig V, Longair M, Pietzsch T, Preibisch S, Rueden  
420 C, Saalfeld S, Schmid B, Tinevez J-Y, White DJ, Hartenstein V, Eliceiri K, Tomancak P, Cardona  
421 A. 2012. Fiji - an Open Source platform for biological image analysis. *Nat Methods*  
422 9:10.1038/nmeth.2019.
- 423 41. Juneau RA, Pang B, Armbruster CE, Murrain KA, Perez AC, Swords WE. 2015. Peroxiredoxin-  
424 Glutaredoxin and Catalase Promote Resistance of Nontypeable *Haemophilus influenzae* 86-  
425 028NP to Oxidants and Survival within Neutrophil Extracellular Traps. *Infect Immun* 83:239–246.
- 426 42. Hartmann R, Jeckel H, Jelli E, Singh PK, Vaidya S, Bayer M, Rode DKH, Vidakovic L, Díaz-  
427 Pascual F, Fong JCN, Dragoš A, Lamprecht O, Thöming JG, Netter N, Häussler S, Nadell CD,  
428 Sourjik V, Kovács ÁT, Yildiz FH, Drescher K. 2021. Quantitative image analysis of microbial  
429 communities with BiofilmQ. *Nat Microbiol* 1–6.
- 430 43. Jurcisek J, Greiner L, Watanabe H, Zaleski A, Apicella MA, Bakaletz LO. 2005. Role of Sialic  
431 Acid and Complex Carbohydrate Biosynthesis in Biofilm Formation by Nontypeable *Haemophilus*  
432 *influenzae* in the Chinchilla Middle Ear. *Infect Immun* 73:3210–3218.
- 433 44. Hunt BC, Stanford D, Xu X, Li J, Gaggar A, Rowe SM, Raju SV, Swords WE. 2020. *Haemophilus*  
434 *influenzae* persists in biofilm communities in a smoke-exposed ferret model of COPD. *ERJ Open*  
435 *Res* 6.
- 436 45. Poole LB. 2015. The Basics of Thiols and Cysteines in Redox Biology and Chemistry. *Free*  
437 *Radic Biol Med* 0:148–157.

- 438 46. Qian J, Klomsiri C, Wright MW, King SB, Tsang AW, Poole LB, Furdui CM. 2011. Simple  
439 synthesis of 1,3-cyclopentanedione derived probes for labelingsulfenic acid proteins. Chem  
440 Commun 47:9203–9205.
- 441 47. Poole LB. 2008. Measurement of Protein Sulfenic Acid Content. Curr Protoc Toxicol Editor Board  
442 Mahin Maines Ed--Chief AI 0 17:Unit17.2.
- 443 48. Vermeë Q, Cohen R, Hays C, Varon E, Bonacorsi S, Bechet S, Thollot F, Corrad F, Poyart C,  
444 Levy C, Raymond J. 2019. Biofilm production by Haemophilus influenzae and Streptococcus  
445 pneumoniae isolated from the nasopharynx of children with acute otitis media. BMC Infect Dis  
446 19.
- 447 49. Jamal M, Ahmad W, Andleeb S, Jalil F, Imran M, Nawaz MA, Hussain T, Ali M, Rafiq M, Kamil  
448 MA. 2018. Bacterial biofilm and associated infections. J Chin Med Assoc 81:7–11.
- 449 50. González JF, Hahn MM, Gunn JS. 2018. Chronic biofilm-based infections: skewing of the  
450 immune response. Pathog Dis 76.
- 451 51. Pozo JLD. 2018. Biofilm-related disease. Expert Rev Anti Infect Ther 16:51–65.
- 452 52. Reniere ML. 2018. Reduce, Induce, Thrive: Bacterial Redox Sensing during Pathogenesis. J  
453 Bacteriol 200.
- 454
- 455
- 456
- 457
- 458
- 459

460 **Table 1.** Gene designations and predicted functions based on homology for genes of interest. Allele  
461 numbers are given in parentheses.

| <b>Glutathione/ Biofilm Related Genes of Interest</b> |                                           |
|-------------------------------------------------------|-------------------------------------------|
| <b>Gene</b>                                           | <b>Predicted Gene Function</b>            |
| <i>gor</i> (NTHI0251)                                 | Predicted glutathione-disulfide reductase |
| <i>grxA</i> (NTHI1601)                                | Glutaredoxin                              |
| <i>bcp</i> (NTHI0361)                                 | Thioredoxin-dependent thiol peroxidase    |
| <i>trxB</i> (NTHI1327)                                | Thioredoxin-disulfide reductase           |
| <i>pgdX</i> (NTHI0705)                                | Peroxiredoxin-glutaredoxin                |
| <i>tpx</i> (NTHI0907)                                 | Thiol peroxidase                          |
| <i>luxS</i> (NTHI0621)                                | AI-2 synthesis protein, quorum signaling  |
| <i>dps</i> (NTHI1817)                                 | DNA binding ferritin-like protein         |

462

463

464

465

466

467

468

**Table 2.** RT-qPCR primers and probes used for analysis of biofilm expression genes.



| Target Gene         | Primer/Probe | Sequence (5' to 3')                    | Amplicon Size (bp) |
|---------------------|--------------|----------------------------------------|--------------------|
| <b><i>pdgX</i></b>  | PdgX F       | GCACTCGTCAGGGTGATAAA                   | 109                |
|                     | PdgX R       | GATGAGCAAGTTGGAGTGAATG                 |                    |
|                     | PdgX Probe   | 6FAM-TGATCGTGTTCTCATTACCGGGCG-QSY      |                    |
| <b><i>luxS</i></b>  | LuxS F       | GAAGTGTCTGAGGCTTGTTAG                  | 103                |
|                     | LuxS R       | CCGTATAGCTTCCGCATTGATAG                |                    |
|                     | LuxS Probe   | 6FAM-AGGTGTACAAGATCAAGCTTCTATTCCCG-QSY |                    |
| <b><i>dps</i></b>   | Dps F        | GGGCTACCACTGGAACATTA                   | 104                |
|                     | Dps R        | GTTCAGCCACCTCATCTACTC                  |                    |
|                     | Dps Probe    | 6FAM-TGCGTGTAATGCAAAGAAGTTTACGCC-QSY   |                    |
| <b><i>omp26</i></b> | Omp26 F      | ACCGCACTTGCTTTAGGTATT                  | 104                |
|                     | Omp26 R      | GCGATCTGGGTGATGTTGAA                   |                    |
|                     | Omp26 Probe  | JOE-TTGCTTCAGGCTATGCTTCCGCT-Zen-BHQ    |                    |

469

470

471

472

473

474 **Figure 1.** Bacterial susceptibility to varying concentrations of hydrogen peroxide (H<sub>2</sub>O<sub>2</sub>) and  
475 quantification of cysteine sulfenic acid protein modifications. A) Oxidative stress and killing of parent,  
476 thiol mutant, and complemented strains as determined by viable plate counting post exposure. The  
477 dashed line represents the limit of detection (LOD). Mean +/- SEM (N=5). Data is representative of  
478 three biological replicates. B) Fold change in cysteine sulfenic acid (CSA) protein modifications post  
479 exposure to 500 mM hydrogen peroxide as determined by densitometry. Mean +/- SD (N=3).

480

481

482

483

484

485

486

487

488

489

490

491

492

493

494

495 **Figure 2.** Immunofluorescent imaging and analysis of redox stress of *in vitro* NTHi biofilms. A)

496 Immunofluorescent staining of 24 hour biofilms exposed to 500 mM hydrogen peroxide. Bacteria were  
497 stained with anti-NTHi antibodies conjugated to Alexa 488 (green) while bacterial oxidative stress was  
498 visualized using CellROX Deep Red (red). Fluorescent pixel intensity maps of the CellROX channel  
499 were generated using BiofilmQ. Images were taken at 60X magnification. Scale bars represent 10  $\mu$ m.

500 B) Mean pixel intensity of the CellROX channel was quantified using BiofilmQ software. Mean +/- SD  
501 (N=5).

502

503

504

505

506

507

508

509

510

511

512

513

514

515

516

517 **Figure 3.** Bacterial infection of smoke exposed and air control murine lungs with NTHi and thiol redox  
518 mutants. A) Schematic detailing infection timeline and smoke exposure regimen for mice cohorts. B)  
519 Persistence in smoke exposed and air control murine lungs as determined by viable plate counting.  
520 Dotted line indicates limit of detection (LOD). Mean +/- SEM (N=6-18). C) Weight of mice 24 hours post  
521 infection. All comparisons of weight were made to the parent strain infected animal group. Mean +/-  
522 SEM (N=6-18). Data is representative of three independent biological replicates.

523

524

525

526

527

528

529

530

531

532

533

534

535

536

537

538 **Figure 4.** Immunofluorescent imaging and RT-qPCR analysis of NTHi biofilms in the smoke exposed  
539 murine lung. A) Immunofluorescent staining of parent strain infected mouse lung sections. Lung  
540 sections are representative of 24 and 48 hours post infection. Nuclei were stained with DAPI (blue)  
541 and bacteria were stained with anti-NTHi polyclonal antibodies conjugated to Alexa 488 (green). NTHi  
542 biofilm components were stained using the *Maackia amurensis* lectin (MAA) conjugated to Texas-  
543 Red, which is specific for neu5Ac  $\alpha$ (2,3) galactose linkages (red). Images are taken at 90X  
544 magnification. Scale bars represent 10  $\mu$ m. B) RT-qPCR analysis of mRNA isolated from infected  
545 mouse lung of biofilm associated genes, in comparison to *omp26* housekeeping gene. Samples were  
546 collected from 24 hours post infection. All samples were run in triplicate. Mean +/- SD (N=4-6).

560 **Figure 5.** Neutrophil extracellular trap (NET) killing assay and fluorescent staining for NETs in  
561 infected mouse lungs. A) 5-6 day differentiated HL60 cells seeded in 24-well plates were activated  
562 with 25 nM phorbol myristate acetate after which 20  $\mu$ M cytochalasin-D was added to prevent killing  
563 via phagocytosis. Bacteria were added at an MOI of 10. Bacterial killing was expressed as a  
564 percentage of counts obtained from control wells. Mean  $\pm$  SEM (N=3). All statistical comparisons  
565 are made to the matched treatment of the parent strain. B) Immunofluorescent staining and confocal  
566 imaging of infected mouse lung sections. Nuclei were stained with DAPI (blue), bacteria were stained  
567 with anti-NTHi polyclonal antibodies conjugated to Alexa 488 (green), while NETs were stained using  
568 anti-Histone H3 Citrulline R2, R8, R17 (red) and propidium iodide (orange). These confocal images  
569 are representative images of mouse lungs 48 hour post infection. Images are taken at 90X  
570 magnification. Scale bars represent 10  $\mu$ m. C) Myeloperoxidase (MPO) activity within the lungs of  
571 infected mice during the course of infection Mean  $\pm$  SD (N=12-18).

A

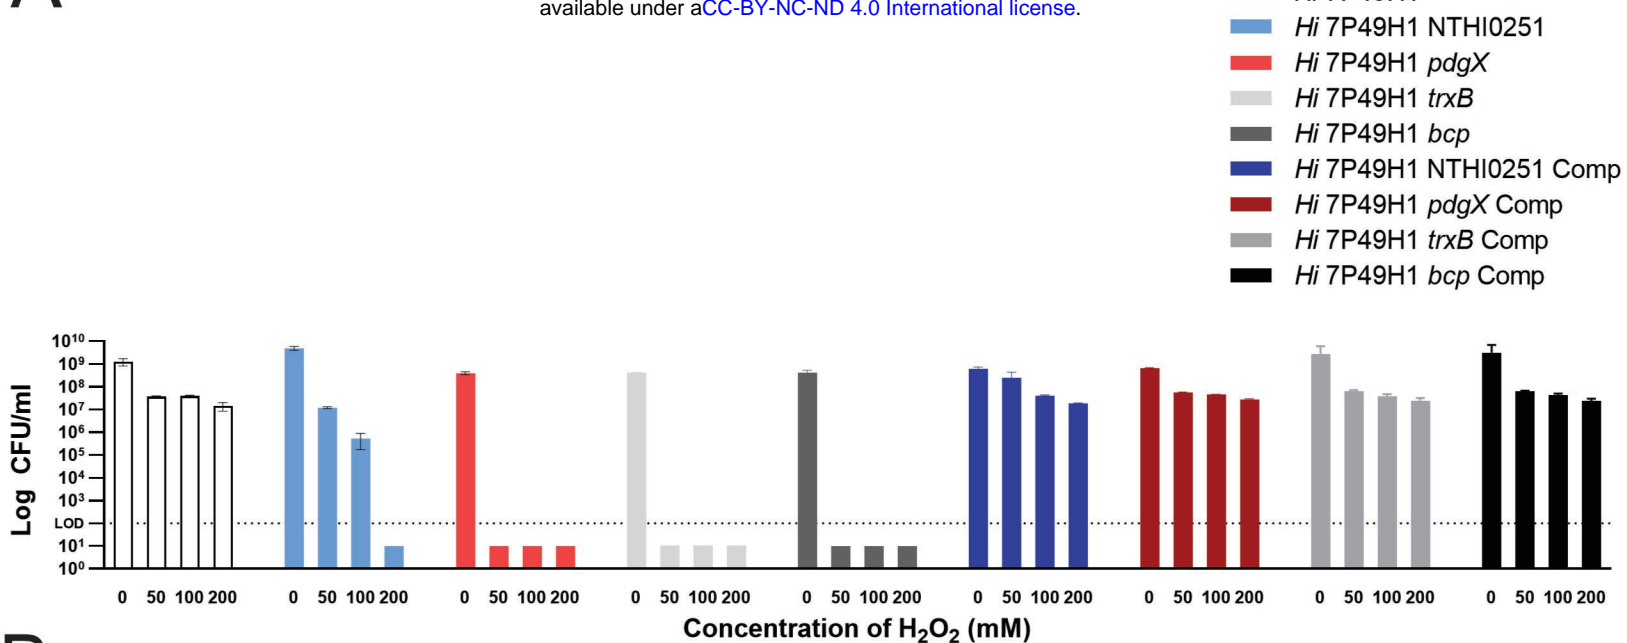

B

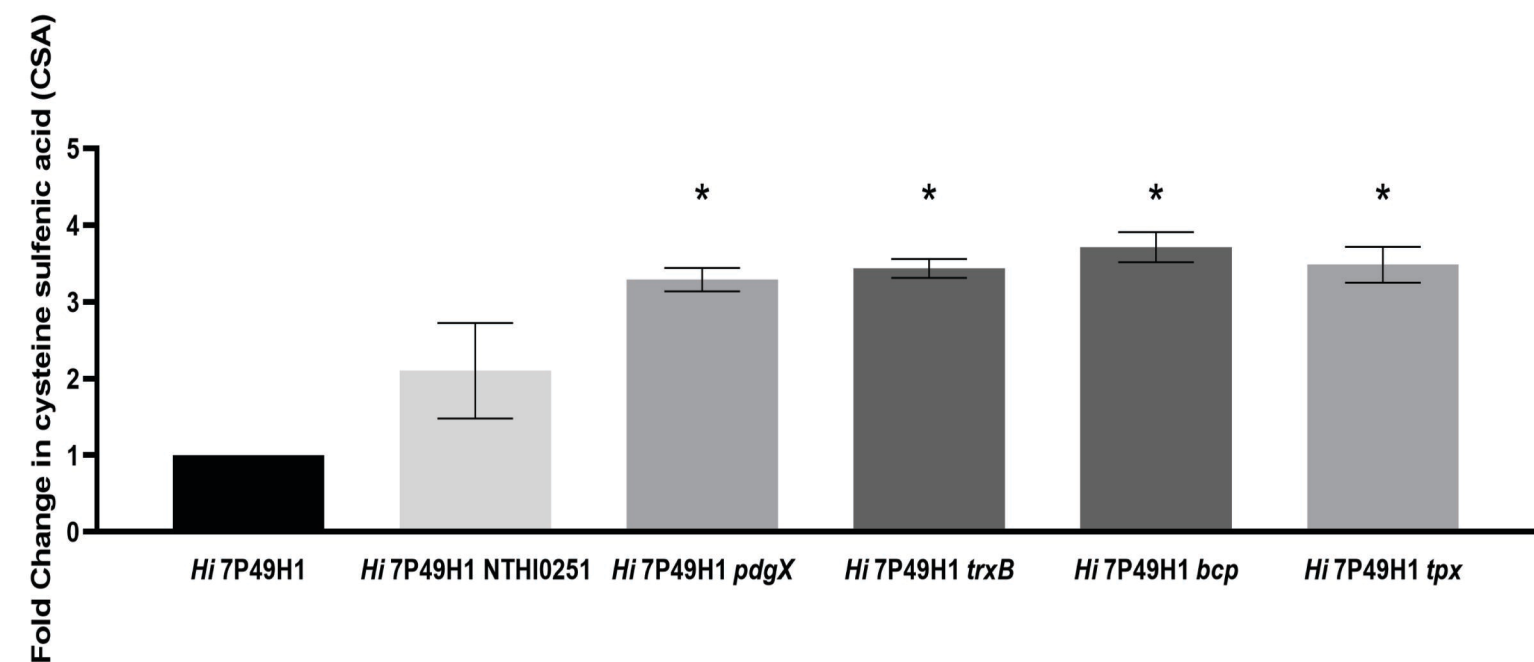

**Figure 1.** Bacterial susceptibility to varying concentrations of hydrogen peroxide and quantification of cysteine sulfenic acid protein modifications. A) Oxidative stress and killing of parent strain, thiol mutant, and complemented strains as determined by viable plate counting post exposure. The dashed line represents the limit of detection (LOD). Mean +/- SEM (N=5). Data is representative of three biological replicates. B) Fold change in cysteine sulfenic acid (CSA) protein modifications post exposure to 500 mM hydrogen peroxide as determined by densitometry.

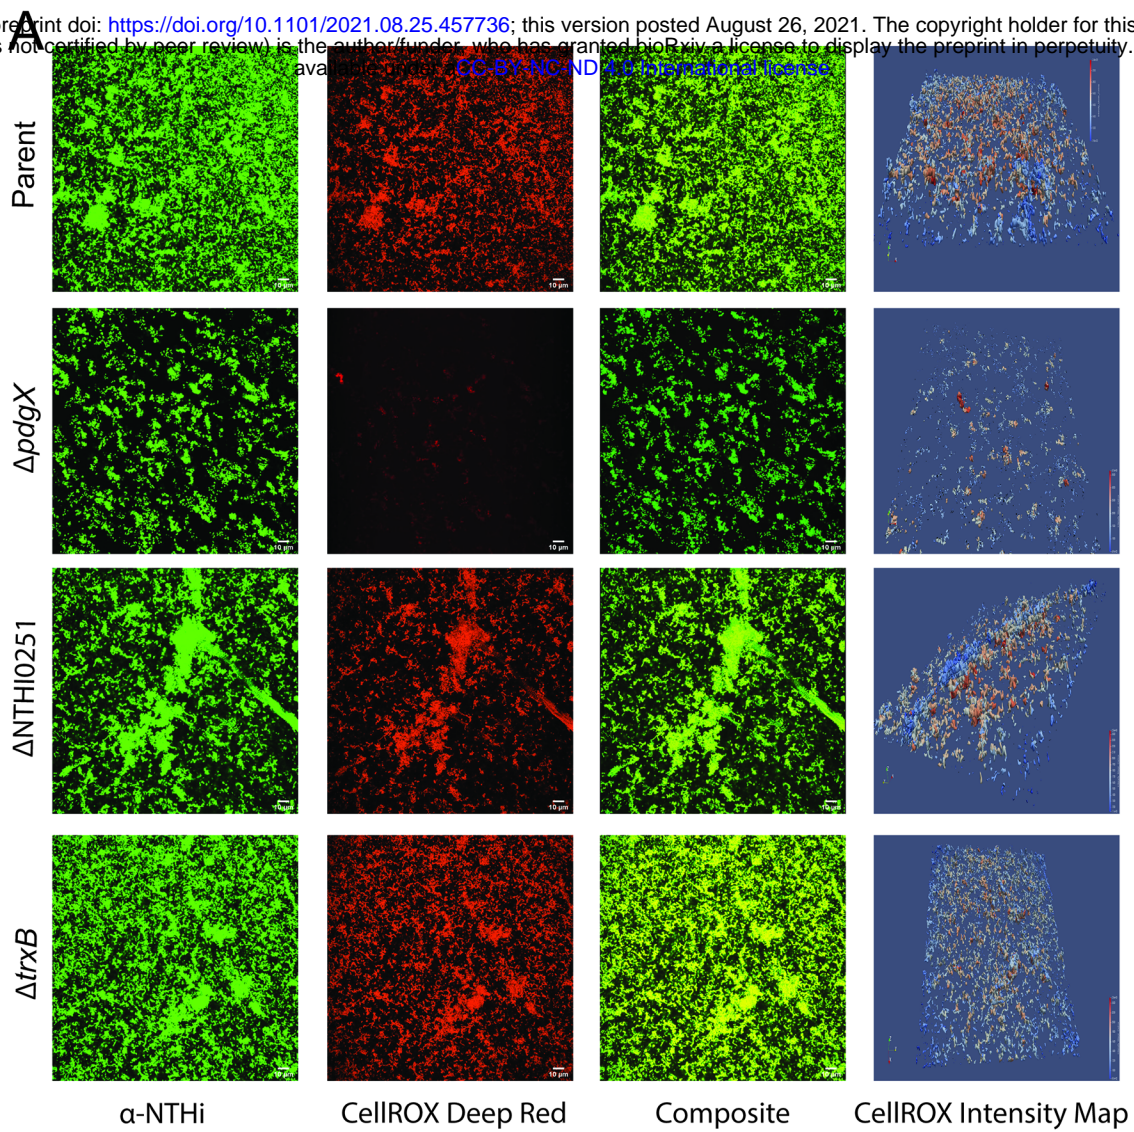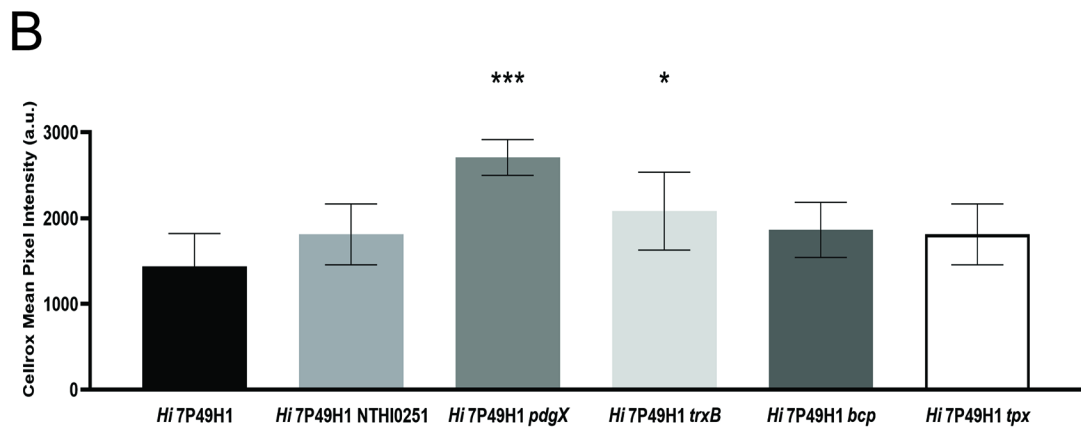

**Figure 2.** Immunofluorescent imaging and analysis of redox stress of *in vitro* NTHi biofilms A) Immunofluorescent staining of 24 hour biofilms exposed to 500 mM hydrogen peroxide. Bacteria were stained with anti-NTHi antibodies conjugated to Alexa 488 (green) while bacterial oxidative stress was visualized using CellROX Deep Red (red). Fluorescent pixel intensity maps of the CellROX channel were generated using BiofilmQ. B) Mean pixel intensity of the CellRox channel was quantified and showed that thiol mutant biofilms had elevated oxidative stress than the parent strain. Mean +/- SD (N=5).



A

## Infection Timeline

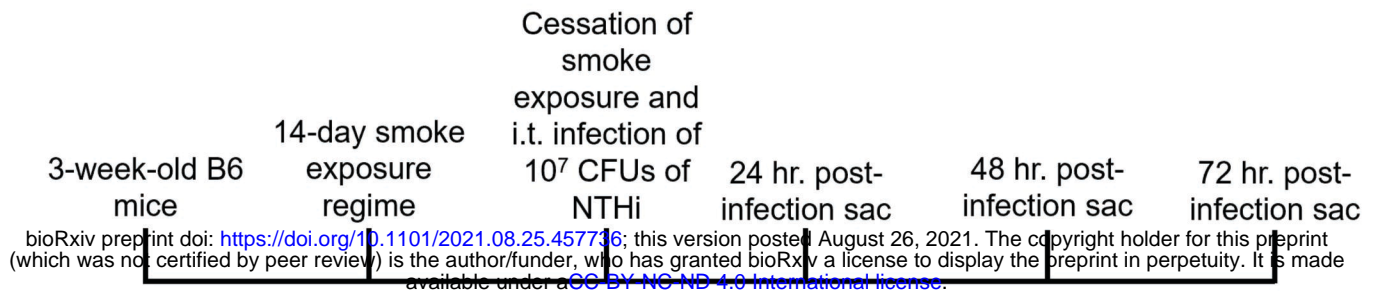

## Smoke Exposure Regime

| Day                                  | 1 | 2  | 3  | 4  | 5  | 6  | 7  | 8   | 9   | 10  | 11  | 12  | 13  | 14  |
|--------------------------------------|---|----|----|----|----|----|----|-----|-----|-----|-----|-----|-----|-----|
| Amount of cigarette exposure per day | 6 | 8  | 10 | 12 | 14 | 16 | 18 | 22  | 24  | 24  | 24  | 24  | 24  | 24  |
| Total amount of cigarette exposure   | 6 | 14 | 24 | 36 | 50 | 66 | 84 | 106 | 130 | 154 | 178 | 202 | 226 | 250 |

B

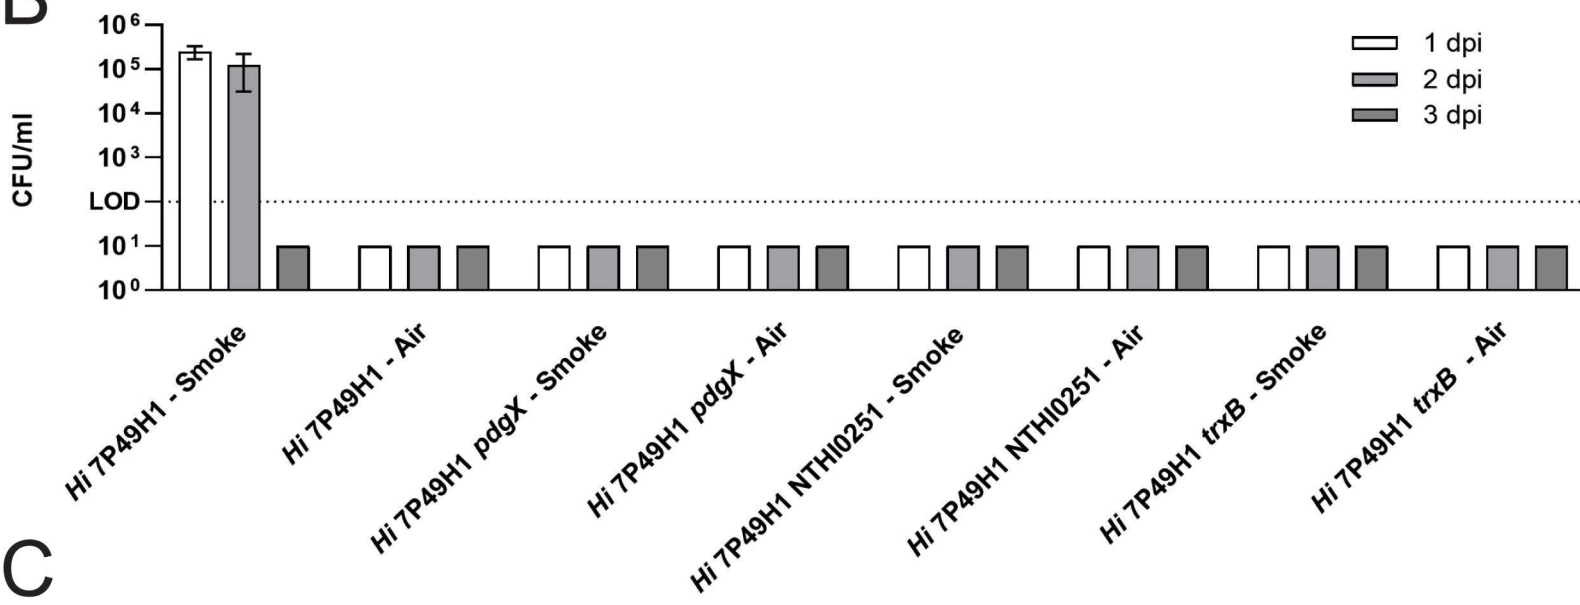

C

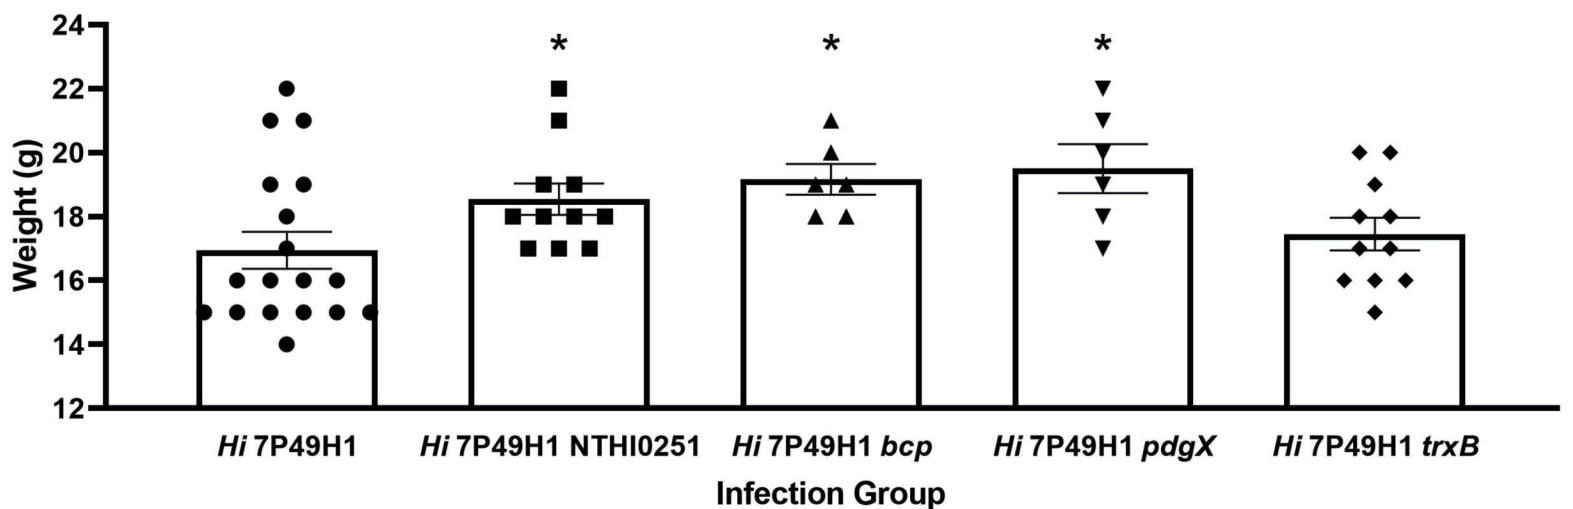

**Figure 3.** Bacterial infection of smoke exposed and air control murine lungs with NTHi thiol redox mutants. A) Schematic detailing infection timeline and smoke exposure regime for mice. B) Persistence in smoke exposed and air control murine lungs as determined by viable plate counting. Dotted line indicates limit of detection. Mean  $\pm$  SEM (N=6). C) Weight of mice at 24 hours post infection. All comparisons of weight are made to the parent strain infected animals. Mean  $\pm$  SEM (N=6-18). Data is representative of three independent biological replicates.

A

24 hours post-infection

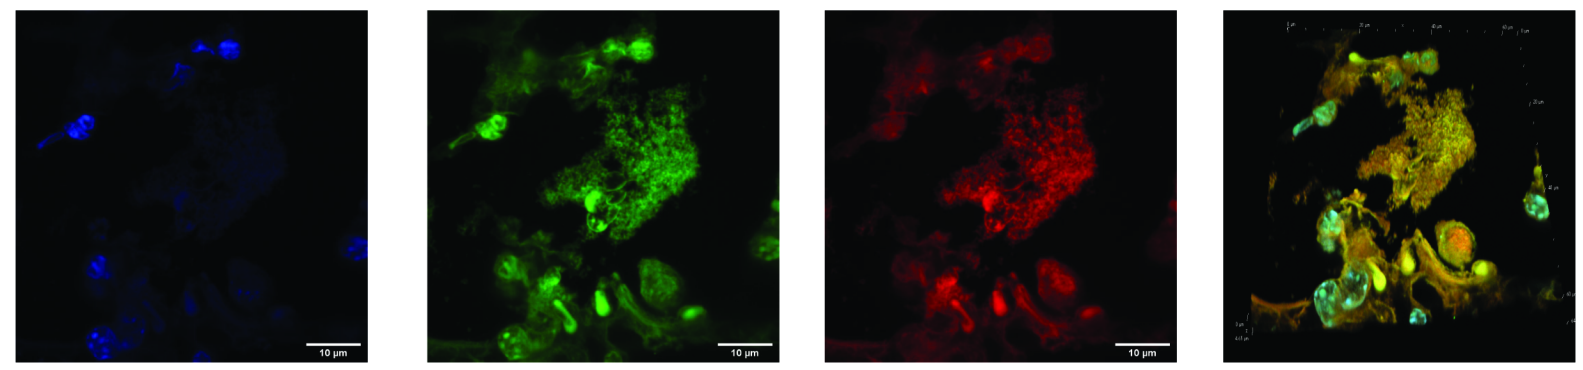

48 hours post-infection

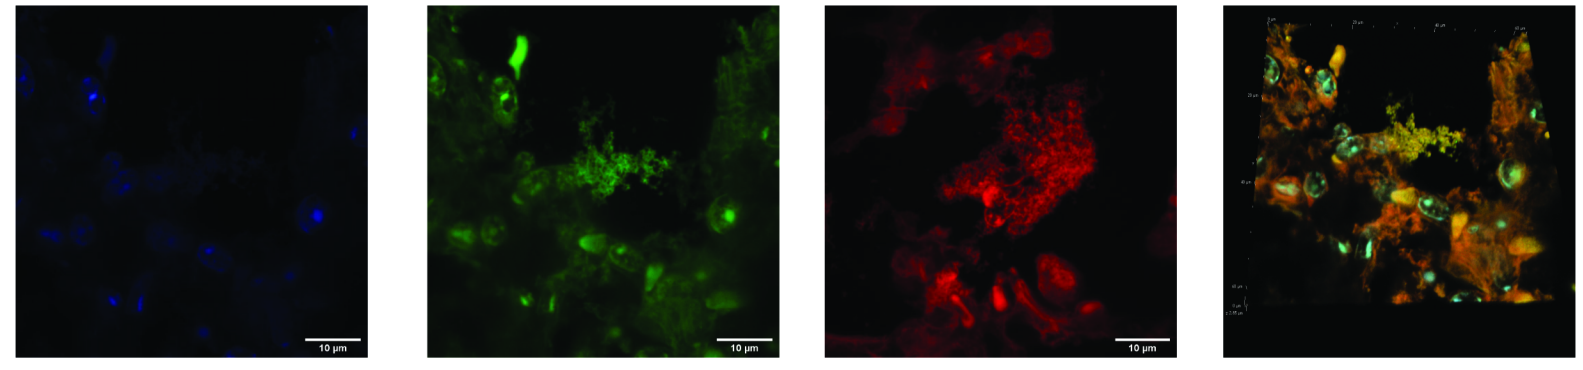

Nuclei                       $\alpha$ -NTHi                      Neu5Ac  $\alpha$ (2,3) galactose specific lectin                      Composite

B

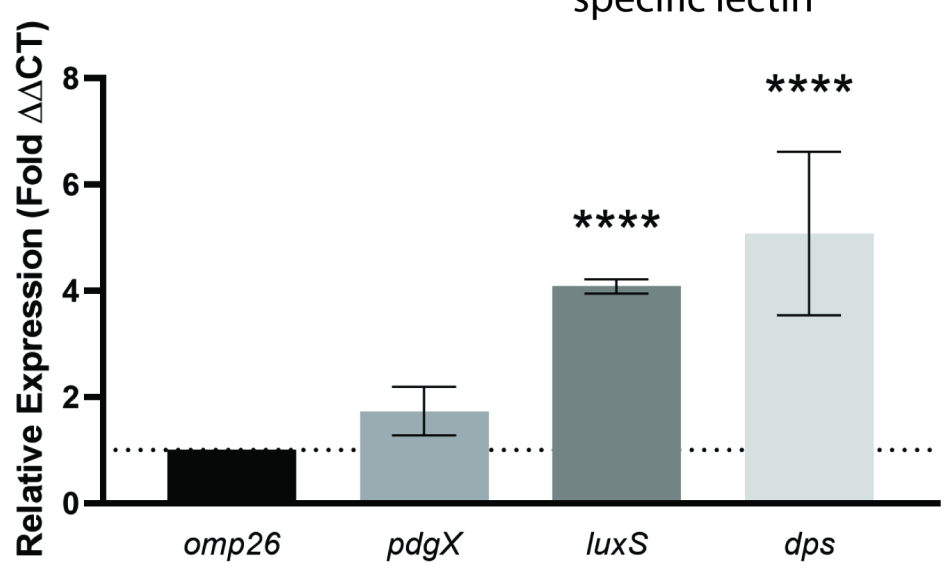

**Figure 4.** Immunofluorescent imaging and RT-qPCR analysis of NTHi biofilms in the smoke exposed murine lung. A) Immunofluorescent staining of parent strain infected mouse lung sections. Lung sections are representative of 24 and 48 hours post infection. Nuclei were stained with DAPI (blue) and bacteria were stained with anti-NTHi polyclonal antibodies conjugated to Alexa 488 (green). NTHi biofilm components were stained using the *Maackia amurensis* lectin (MAA) conjugated to Texas-Red, which is specific for neu5Ac  $\alpha$ (2,3) galactose linkages (red). Images are taken at 90X magnification. Scale bars represent 10  $\mu$ m. B) RT-qPCR analysis of mRNA isolated from infected mouse lung of biofilm associated genes, in comparison to *omp26* housekeeping gene. Samples were collected from 24 hours post infection. All samples were run in triplicate. Mean +/- SD, N=4-6.

A

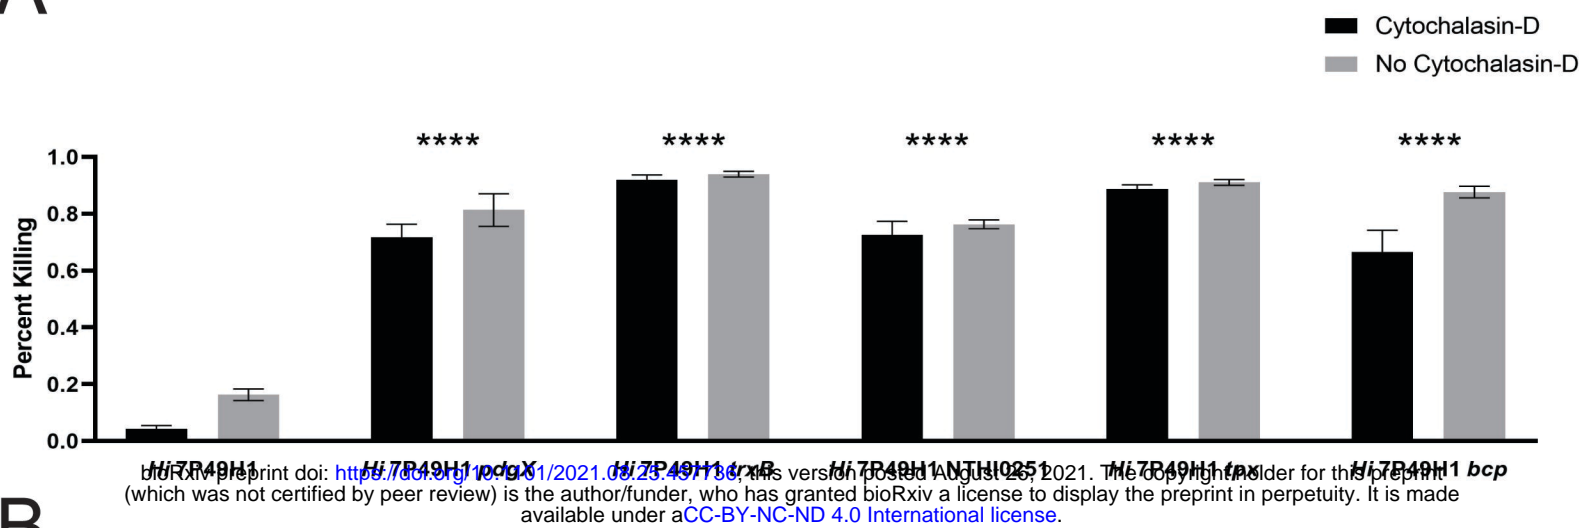

B

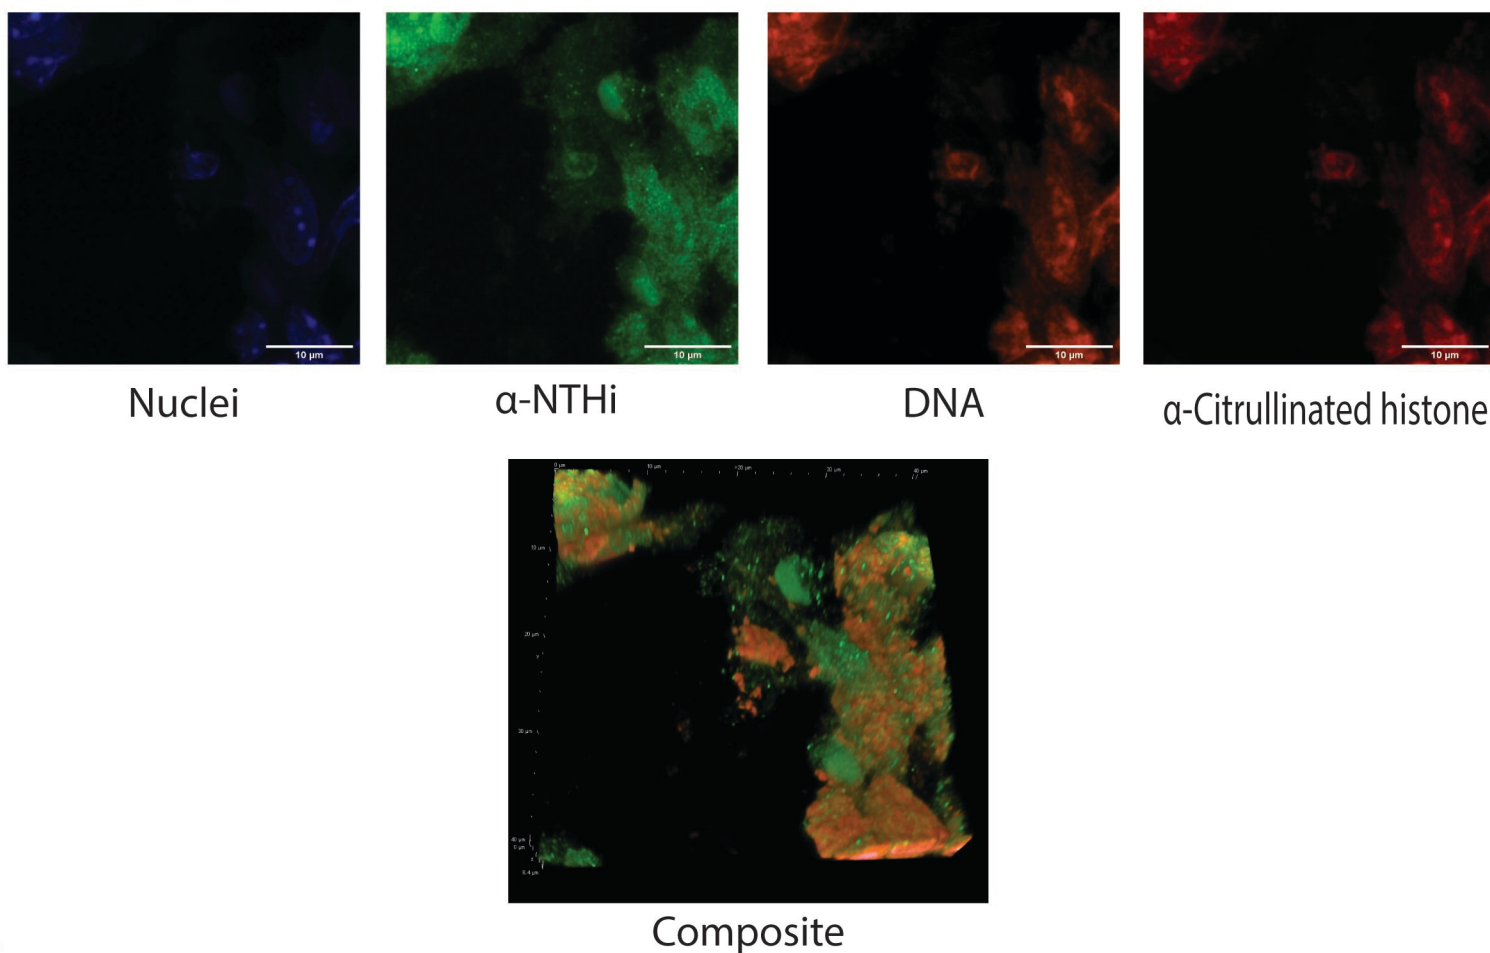

C

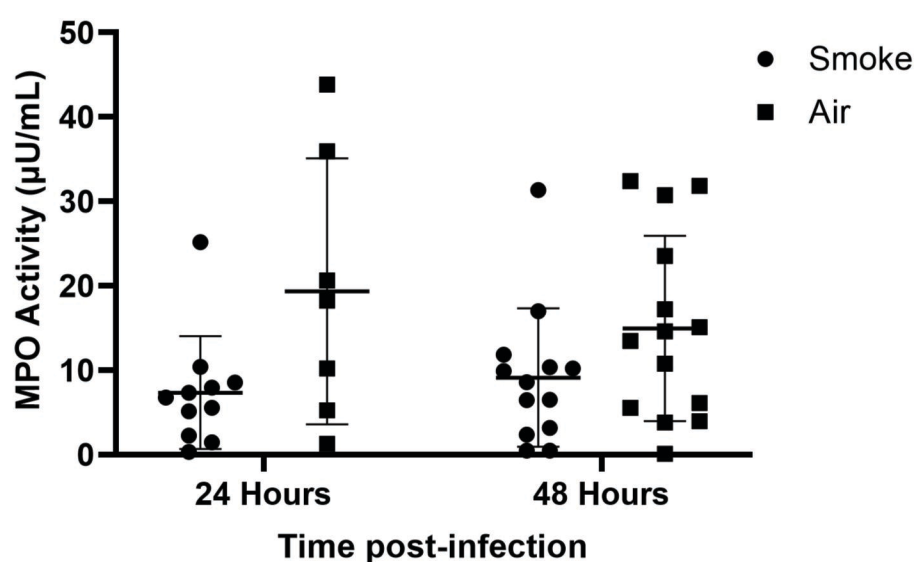

**Figure 5.** Neutrophil extracellular trap (NET) killing assay and fluorescent staining for NETs in infected mouse lungs. A) 5-6 day differentiated HL60 cells seeded in 24-well plates were activated with 25 nM phorbol myristate acetate after which 20  $\mu$ M cytochalasin-D was added to prevent killing via phagocytosis. Bacteria were added at an MOI of 10. Bacterial killing was expressed as a percentage of counts obtained from control wells. Mean  $\pm$  SEM (N=3). All statistical comparisons are made to the matched treatment of the parent strain. B) Immunofluorescent staining and confocal imaging of infected mouse lung sections. Nuclei were stained with DAPI (blue), bacteria were stained with anti-NTHi polyclonal antibodies conjugated to Alexa 488 (green), while NETs were stained using anti-Histone H3 Citrulline R2, R8, R17 (red) and propidium iodide (orange). These confocal images are representative images of mouse lungs 48 hour post infection. Images are taken at 90X magnification. Scale bars represent 10  $\mu$ m. C) Myeloperoxidase (MPO) activity within the lungs of infected mice during the course of infection Mean  $\pm$  SD (N=12-18).
